# Supplementary material for: Non-indicated initiation of proton pump inhibitor and risk of adverse outcomes in patients with underlying chronic kidney disease: a nationwide, retrospective, cohort study
Source: HighWire-hosted journal article supplement (doi:10.1136/bmjopen-2023-078032), 2024-01-01
Supplement: bmjopen-2023-078032supp001_data_supplement.pdf [file bmjopen-2023-078032supp001_data_supplement.pdf]

**Supplement Table 1. Cox regression analysis in subgroups according to diabetes and low eGFR**

| Subgroup        |      | ESKD                    |          |             | Mortality               |          |             | MI                      |          |             | Stroke                  |          |             |
|-----------------|------|-------------------------|----------|-------------|-------------------------|----------|-------------|-------------------------|----------|-------------|-------------------------|----------|-------------|
|                 |      | Adjusted HR<br>(95% CI) | <i>P</i> | <i>*Pi</i>  |
| <b>Diabetes</b> |      |                         |          |             |                         |          |             |                         |          |             |                         |          |             |
| Yes             | PPI  | 1.21 (0.74 to 1.96)     | 0.45     | <i>0.01</i> | 1.09 (0.86 to 1.39)     | 0.48     | <i>0.61</i> | 0.69 (0.35 to 1.35)     | 0.27     | <i>0.79</i> | 0.87 (0.52 to 1.48)     | 0.61     | <i>0.45</i> |
|                 | H2RA | 1 (Reference)           |          |             |
| No              | PPI  | 3.07 (1.64 to 5.74)     | < 0.001  |             | 1.17 (0.93 to 1.46)     | 0.18     |             | 0.71 (0.38 to 1.33)     | 0.29     |             | 1.20 (0.74 to 1.94)     | 0.46     |             |
|                 | H2RA | 1 (Reference)           |          |             |
| <b>eGFR</b>     |      |                         |          |             |                         |          |             |                         |          |             |                         |          |             |
| ≥ 60            | PPI  | 2.59 (0.79 to 8.42)     | 0.55     | <i>0.59</i> | 1.14 (0.74 to 1.76)     | 0.58     | <i>0.95</i> | 0.94 (0.30 to 2.90)     | 0.91     | <i>0.54</i> | 0.99 (0.42 to 2.31)     | 0.98     | <i>0.86</i> |
|                 | H2RA | 1 (Reference)           |          |             |
| < 60            | PPI  | 1.63 (1.09 to 2.43)     | 0.02     |             | 1.14 (0.96 to 1.36)     | 0.15     |             | 0.68 (0.41 to 1.12)     | 0.13     |             | 0.98 (0.66 to 1.45)     | 0.91     |             |
|                 | H2RA | 1 (Reference)           |          |             |

eGFR, estimated glomerular filtration rate; ESKD, end-stage kidney disease; MI, myocardial infarction; PPI, proton pump inhibitor; H2RA, histamine type 2 receptor antagonist

Adjusted for age, sex, BMI, hypertension, diabetes, eGFR, albuminuria, dyslipidemia, COPD, current smoker, alcohol, regular exercise, low income, and region of residence (urban or rural)

*\*P value for interaction*

**Supplement Table 2. IPTW weighted Cox regression analysis of clinical outcomes**

| <b>Outcome</b>   | <b>Group</b> | <b>Weighted Incidence Rate (per 1000 PY)</b> | <b>Weighted HR (95% CI)</b> | <b>P</b> |
|------------------|--------------|----------------------------------------------|-----------------------------|----------|
| <b>ESKD</b>      | PPI          | 13.31                                        | 1.72 (1.19 to 2.48)         | 0.03     |
|                  | H2RA         | 7.86                                         | 1 (Reference)               |          |
| <b>Mortality</b> | PPI          | 66.26                                        | 1.14 (0.96 to 1.34)         | 0.12     |
|                  | H2RA         | 55.74                                        | 1 (Reference)               |          |
| <b>MI</b>        | PPI          | 7.60                                         | 0.72 (0.46 to 1.13)         | 0.1      |
|                  | H2RA         | 10.73                                        | 1 (Reference)               |          |
| <b>Stroke</b>    | PPI          | 14.48                                        | 1.04 (0.74 to 1.48)         | 0.9      |
|                  | H2RA         | 13.52                                        | 1 (Reference)               |          |

IPTW, inverse probability of treatment weight; PY, person-year; HR, hazard ratio; ESKD, end-stage kidney disease; MI, myocardial infarction
